# Supplementary material for: Heteroleptic cationic iridium(iii) complexes bearing phenanthroline derivatives with extended π-conjugation as potential broadband reverse saturable absorbers
Source: Royal Society of Chemistry journal article supplement (doi:10.1039/c9nj03877a), 2019-12-05
Supplement: c9nj03877a1.pdf [file c9nj03877a1.pdf]

Electronic Supplementary Information for

**Heteroleptic Cationic Iridium(III) Complexes Bearing Phenanthroline Derivatives with Extended  $\pi$ -Conjugation as Potential Broadband Reverse Saturable Absorbers**

*Li Wang,<sup>a</sup> Peng Cui,<sup>a,b</sup> Levi Lystrom,<sup>a</sup> Jiapeng Lu,<sup>a</sup> Svetlana Kilina<sup>a</sup> and Wenfang Sun<sup>a,\*</sup>*

<sup>a</sup> Department of Chemistry and Biochemistry, <sup>b</sup> Materials and Nanotechnology Program, North Dakota State University, Fargo, North Dakota 58108-6050, United States

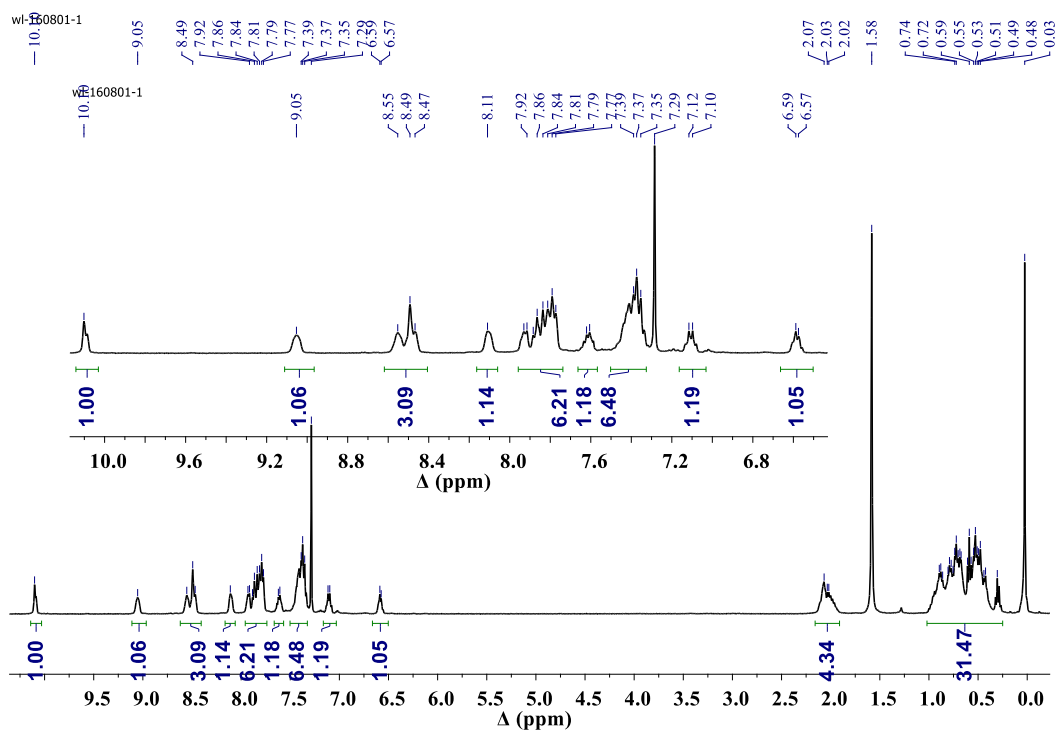

**Fig. S1**  $^1\text{H}$  NMR spectrum of complex **2** in  $\text{CDCl}_3$ .

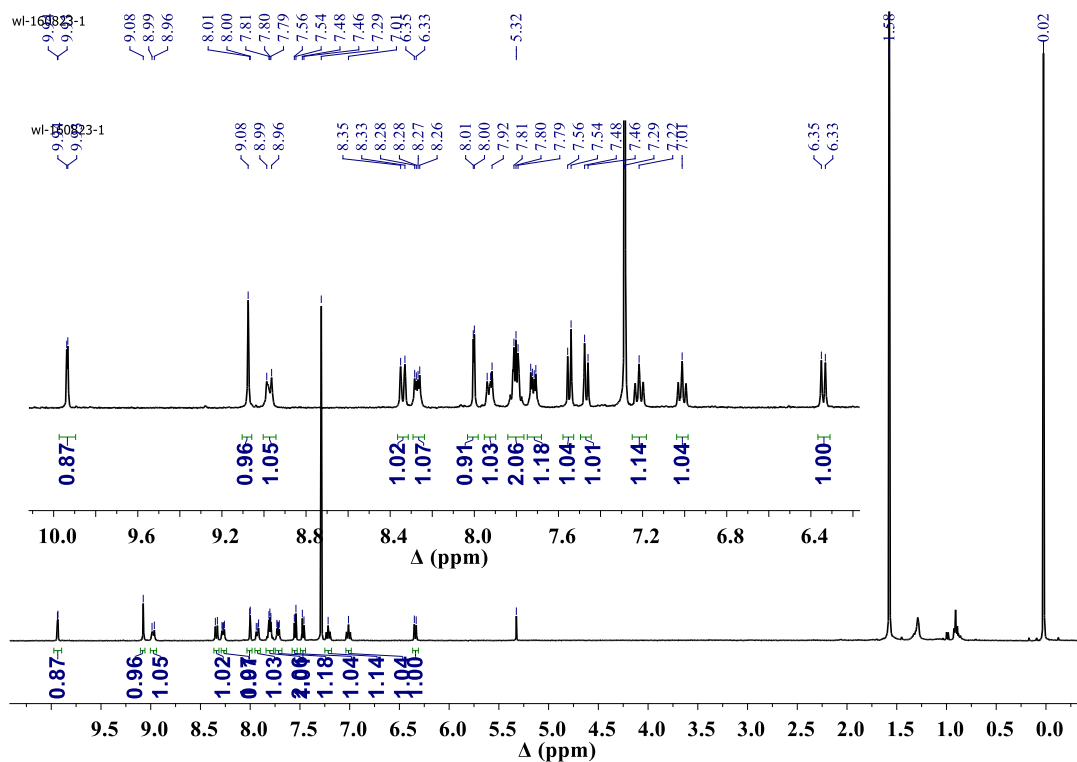

**Fig. S2**  $^1\text{H}$  NMR spectrum of complex  $\text{Ir}(\text{piq})_2(\text{dppn-2Br})$  in  $\text{CDCl}_3$ .

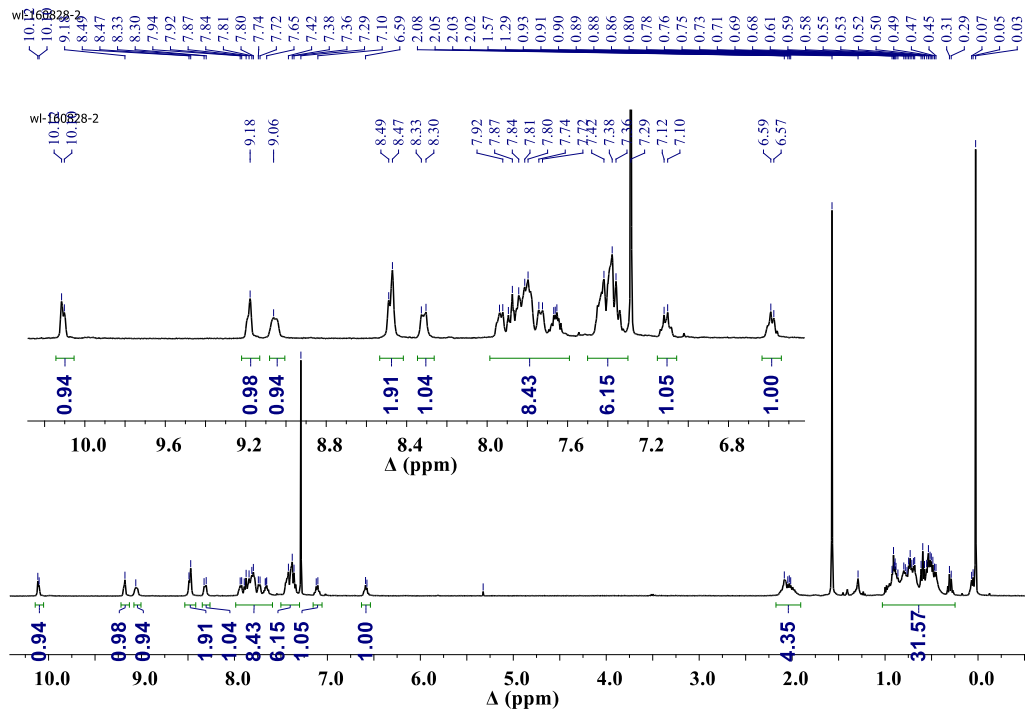

**Fig. S3**  $^1\text{H}$  NMR spectrum of complex **3** in  $\text{CDCl}_3$ .

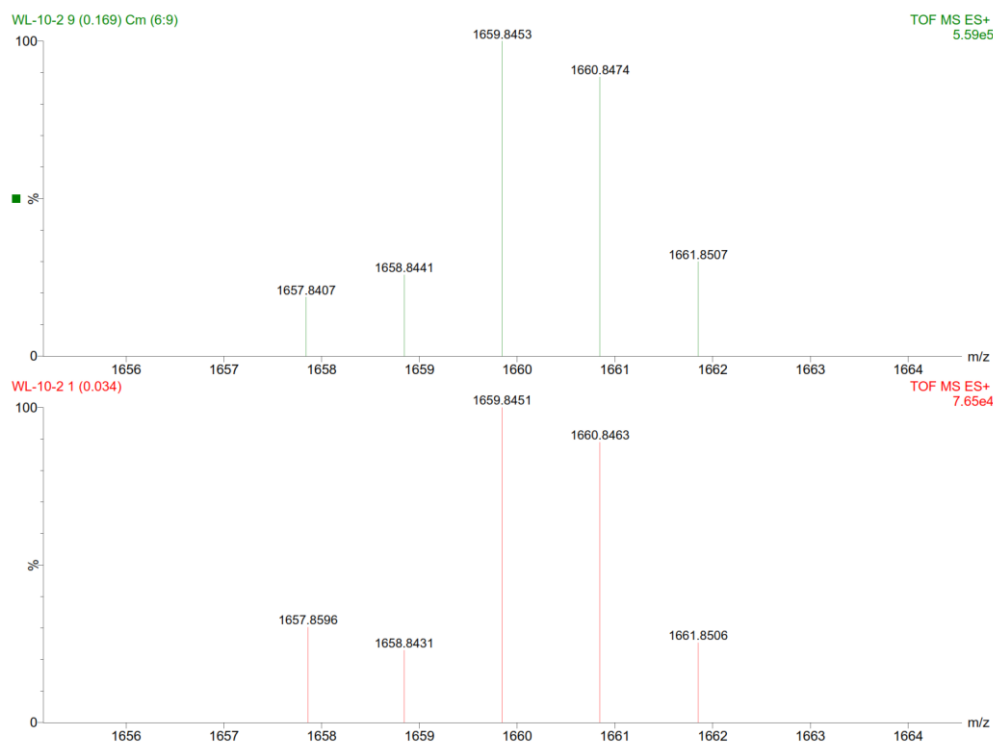

**Fig. S4** HRMS spectra of complex **2**. Top: theoretical spectrum calculated for  $\text{C}_{106}\text{H}_{110}\text{IrN}_6$  ( $\text{M-PF}_6$ ); Bottom: experimental spectrum.

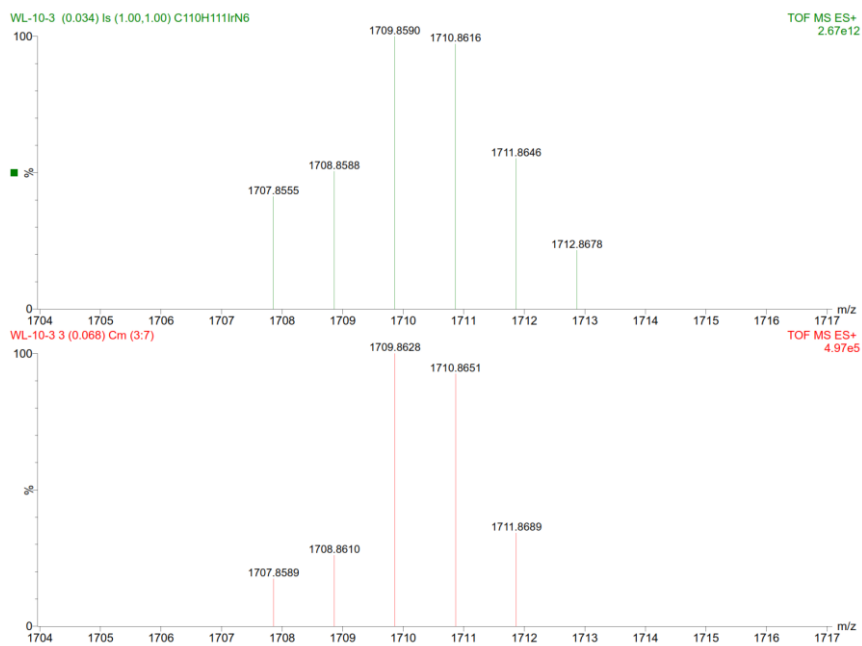

**Fig. S5** HRMS spectra of complex **3**. Top: theoretical spectrum calculated for C<sub>110</sub>H<sub>112</sub>IrN<sub>6</sub> (M-PF<sub>6</sub>); Bottom: experimental spectrum.

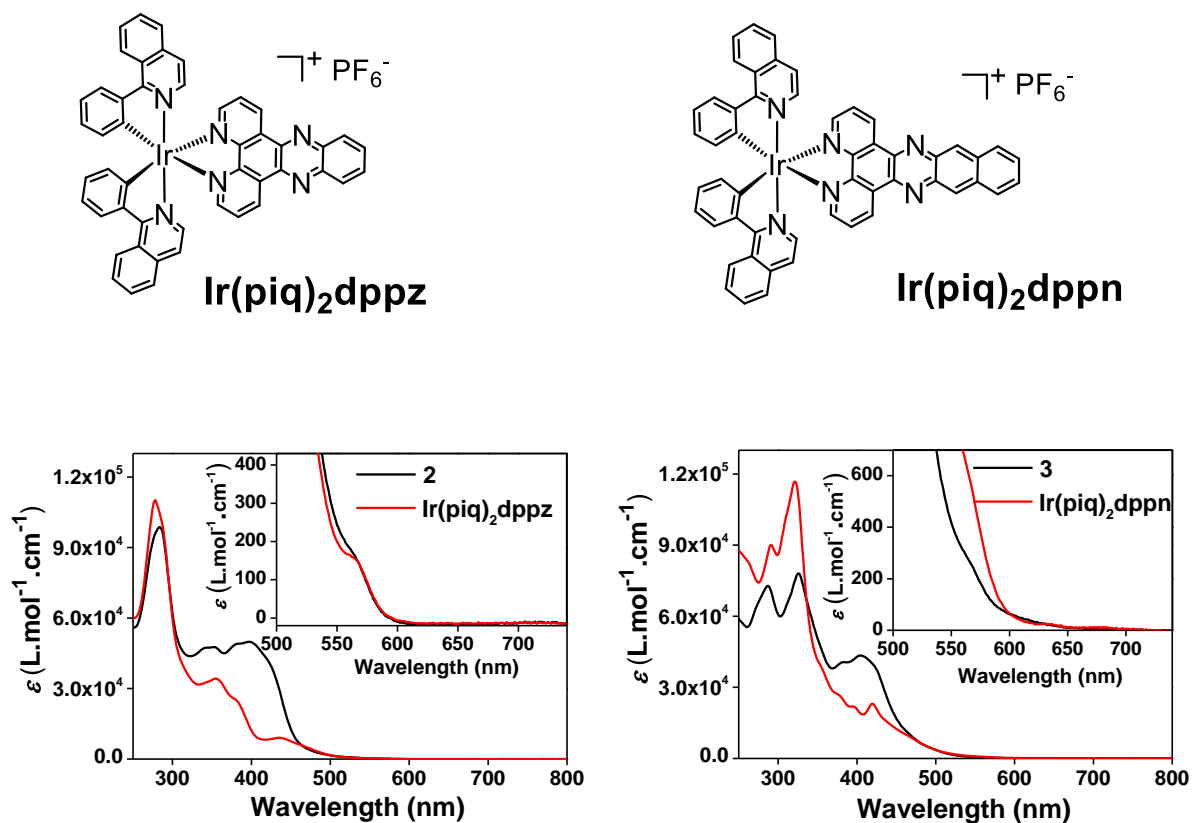

**Fig. S6** Comparison of the UV-vis absorption spectra of complexes **2** and **3** to those of their corresponding complexes without the fluorenyl substituents **Ir(piq)<sub>2</sub>dppz** and **Ir(piq)<sub>2</sub>dppn** in acetonitrile solutions.

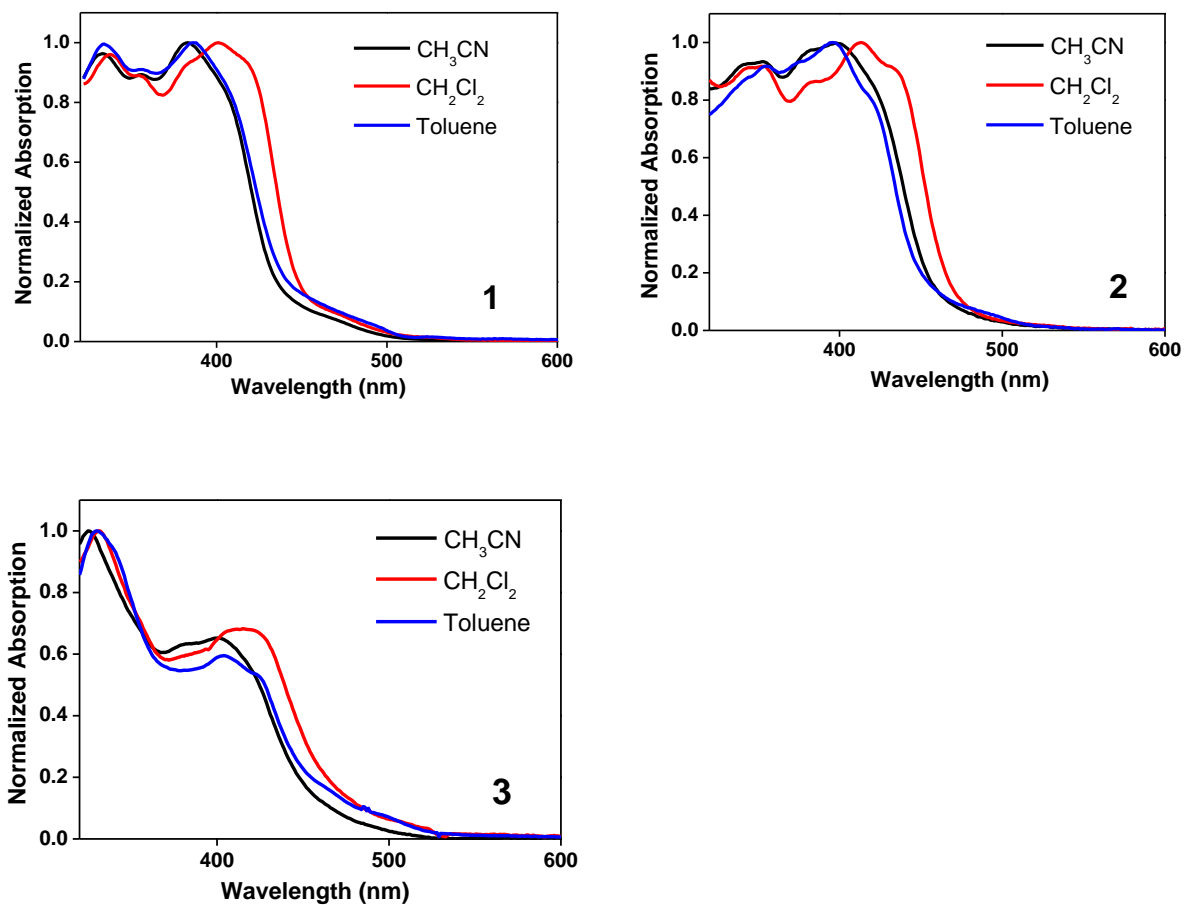

**Fig. S7** Normalized UV-vis absorption spectra of complexes **1-3** in different solvents.

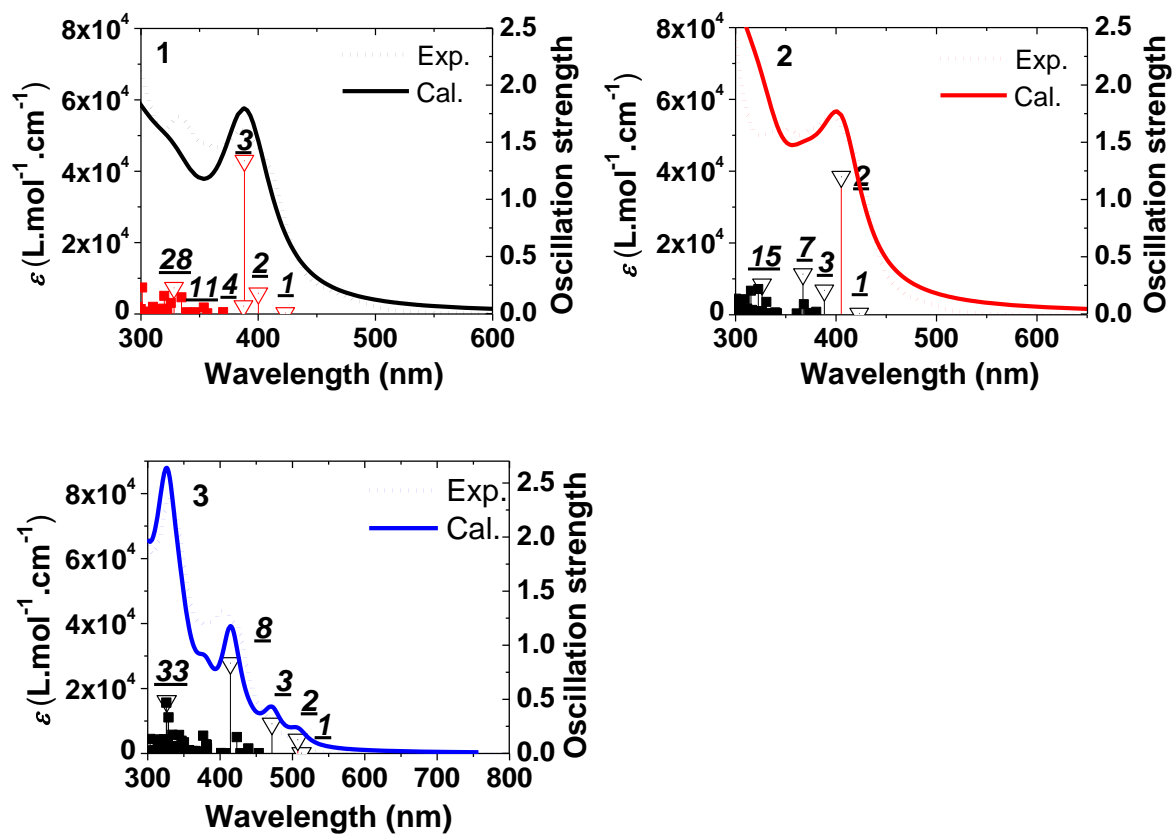

**Fig. S8** Comparison of the experimental and calculated UV-vis absorption spectra of complexes **1-3** in toluene.

**Table S1** Natural transition orbitals (NTOs) representing main absorption bands for complexes **1-3** in toluene.

|          | $S_n$                            | Holes                                                                                   | Electrons                                                                                 |
|----------|----------------------------------|-----------------------------------------------------------------------------------------|-------------------------------------------------------------------------------------------|
| <b>1</b> | $S_2$<br>401 nm<br>$f = 0.18$    | 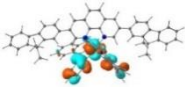       |        |
|          | $S_3$<br>389 nm<br>$f = 1.34$    |        |        |
|          | $S_4$<br>388 nm<br>$f = 0.07$    |        |        |
|          | $S_{11}$<br>329 nm<br>$f = 0.23$ |        |        |
|          | $S_{28}$<br>290 nm<br>$f = 0.06$ |  65%  |  65%  |
|          |                                  |  19% |  19% |
| <b>2</b> | $S_2$<br>406 nm<br>$f = 1.20$    |      |      |
|          | $S_3$<br>389 nm<br>$f = 0.21$    |      |      |
|          | $S_7$<br>368 nm<br>$f = 0.35$    |      |      |
|          | $S_{15}$<br>327 nm<br>$f = 0.26$ |  67% |  67% |
|          |                                  |  17% |  17% |



**3**

$S_8$   
415 nm  
 $f = 0.83$

$S_{33}$   
327 nm  
 $f = 0.48$

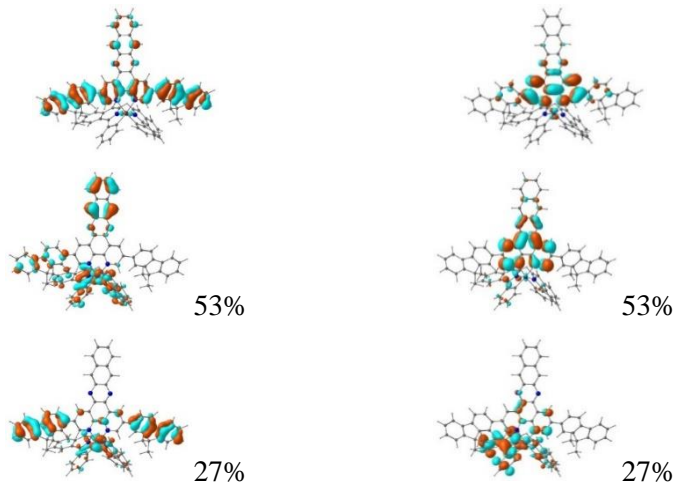

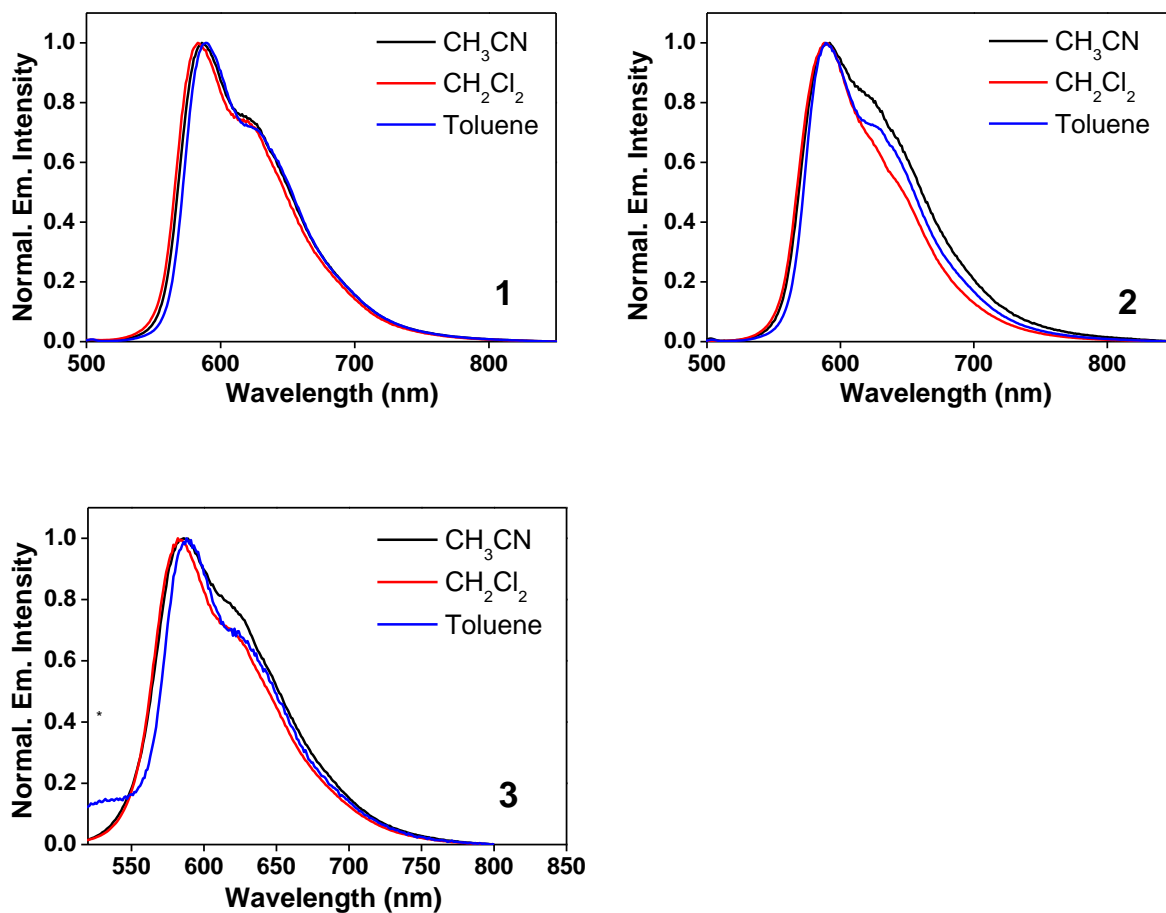

**Fig. S9** Normalized emission spectra of complexes **1-3** in different solvents at room temperature.  $\lambda_{\text{ex}} = 436$  nm.

**Table S2** Emission band maxima ( $\lambda_{em}$ ), lifetimes ( $\tau_{em}$ ) and quantum yields ( $\Phi_{em}$ ) for complexes **1-3** in different solvents at room temperature.

|          | $\lambda_{em}/nm$ ( $\tau_{em}/\mu s$ ); $\Phi_{em}$ |                                 |                   |
|----------|------------------------------------------------------|---------------------------------|-------------------|
|          | CH <sub>3</sub> CN                                   | CH <sub>2</sub> Cl <sub>2</sub> | Toluene           |
| <b>1</b> | 586 (3.30); 0.35                                     | 583 (3.80); 0.40                | 590 (3.10); 0.46  |
| <b>2</b> | 590 (1.05); 0.13                                     | 590 (4.42); 0.57                | 590 (2.93); 0.40  |
| <b>3</b> | 587 (2.37); 0.035                                    | 588 (2.84); 0.077               | 590 (2.00); 0.003 |

**Table S3** Natural transition orbitals (NTOs) of the low(est)-energy triplet transitions of **1-3** in acetonitrile.

|          | $T_n$           | Hole                                                                              | Electron                                                                            |
|----------|-----------------|-----------------------------------------------------------------------------------|-------------------------------------------------------------------------------------|
| <b>1</b> | $T_1$<br>910 nm | 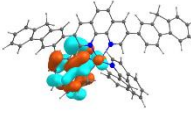 |  |
| <b>2</b> | $T_1$<br>905 nm |  |  |
| <b>3</b> | $T_1$<br>935 nm |  |  |
|          | $T_2$<br>909 nm |  |  |

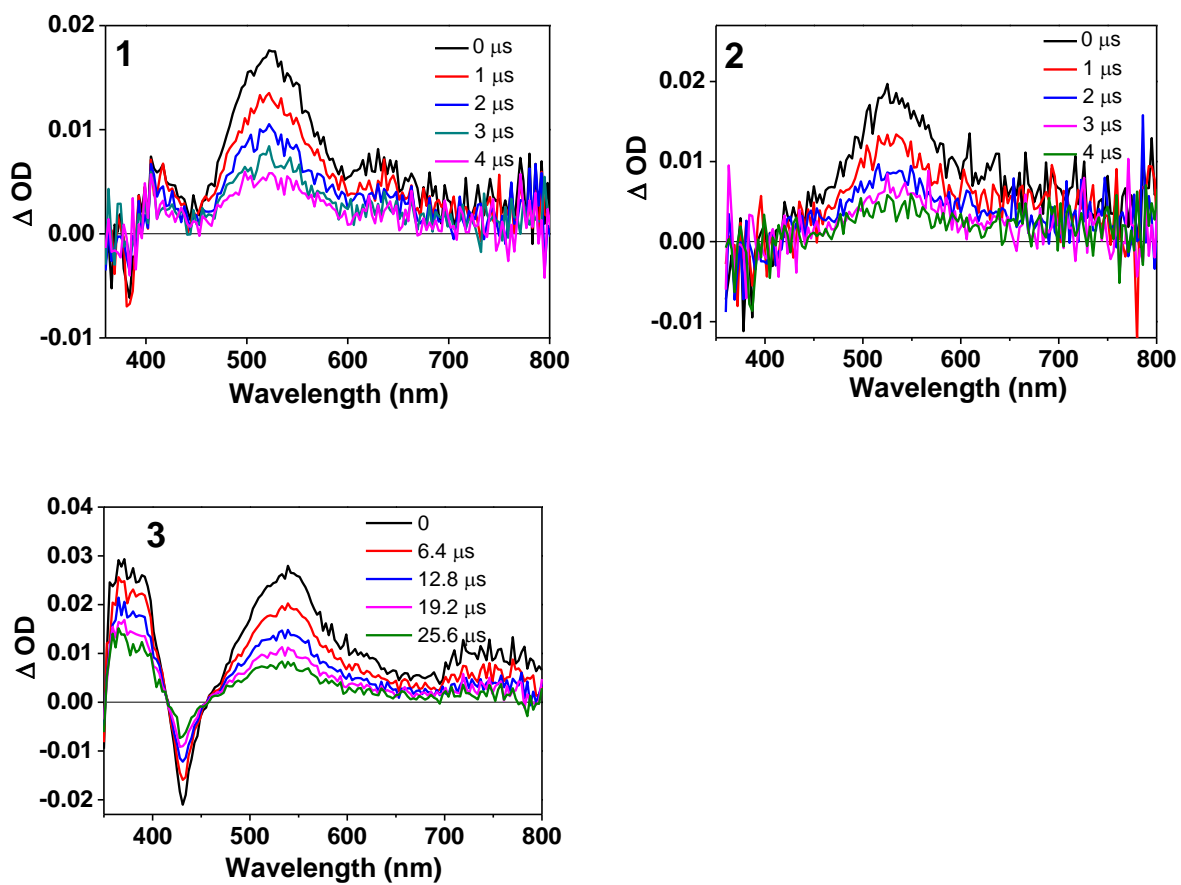

**Fig. S10** Time-resolved ns transient absorption spectra of complexes **1-3** in deoxygenated toluene.  $\lambda_{ex} = 355$  nm,  $A_{355\text{ nm}} = 0.4$  in a 1-cm cuvette.

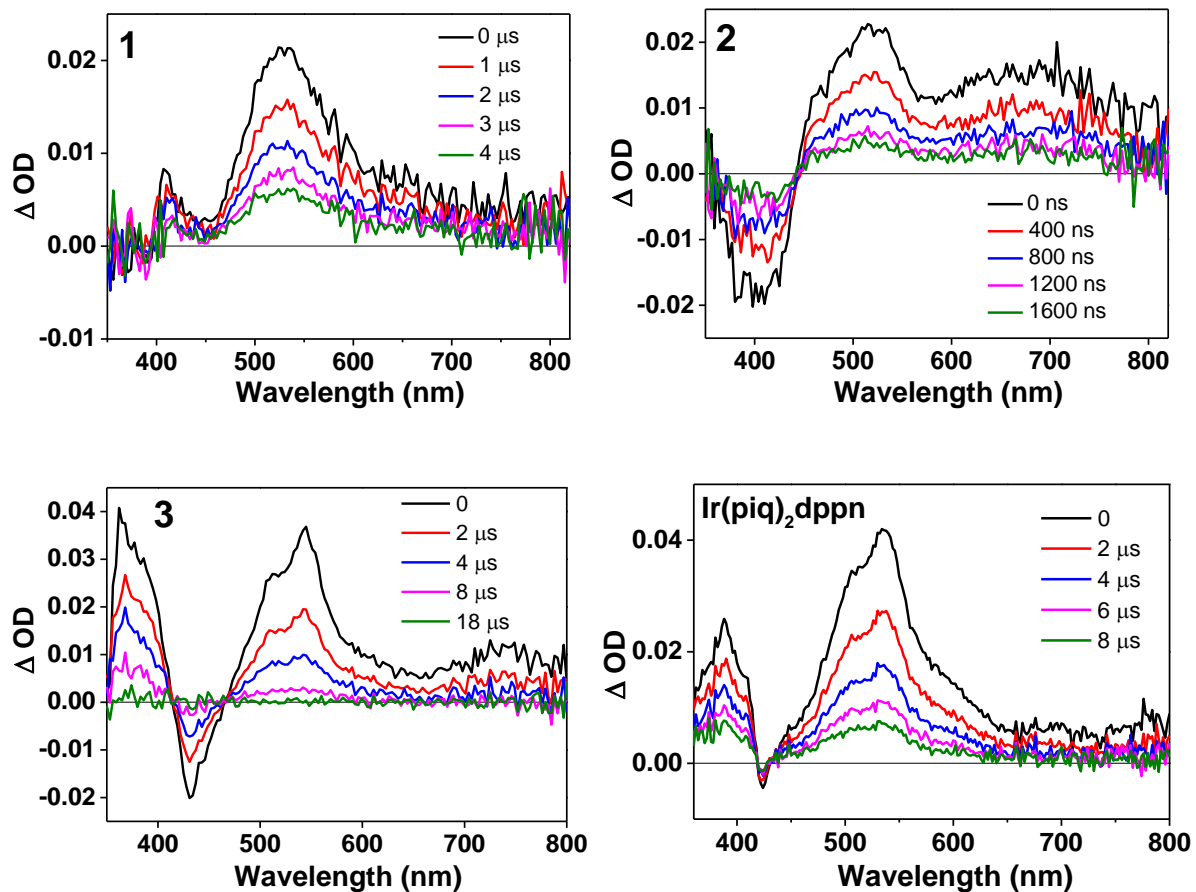

**Fig. S11** Time-resolved ns transient absorption spectra of complexes **1-3** and complexes  $\text{Ir}(\text{piq})_2\text{dppn}$  in deoxygenated acetonitrile.  $\lambda_{\text{ex}} = 355 \text{ nm}$ ,  $A_{355 \text{ nm}} = 0.4$  in a 1-cm cuvette.

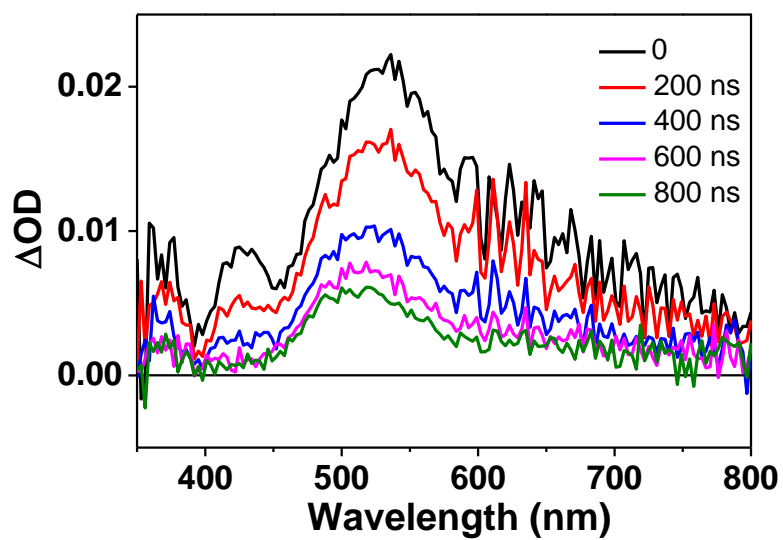

**Fig. S12** Time-resolved ns transient absorption spectra of [Ir(piq)<sub>2</sub>Cl]<sub>2</sub> in deoxygenated acetonitrile.  $\lambda_{\text{ex}} = 355 \text{ nm}$ ,  $A_{355 \text{ nm}} = 0.4$  in a 1-cm cuvette.

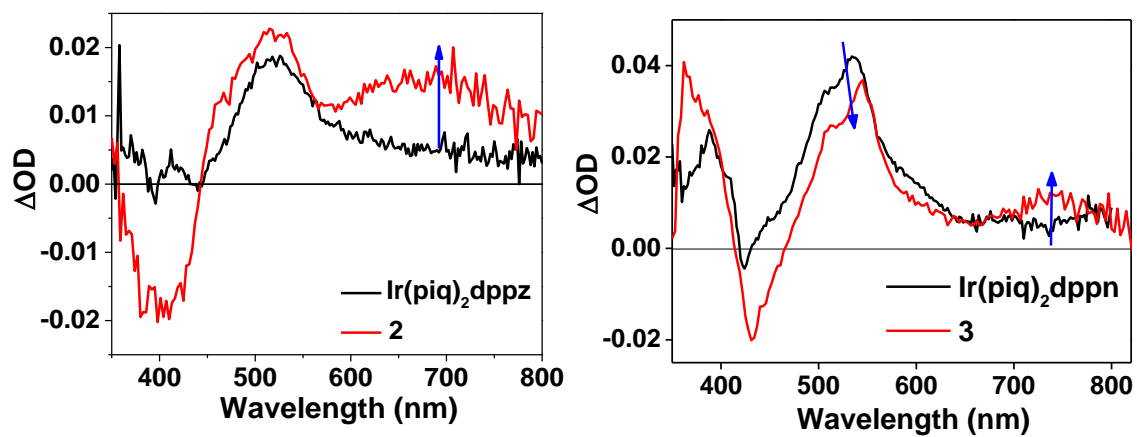

**Fig. S13** Comparison of ns transient absorption spectra at zero-time delay for complexes **2** and **3** with **Ir(piq)<sub>2</sub>dppz** and **Ir(piq)<sub>2</sub>dppn**, respectively, in deoxygenated acetonitrile.  $\lambda_{\text{ex}} = 355 \text{ nm}$ ,  $A_{355 \text{ nm}} = 0.4$  in a 1-cm cuvette.



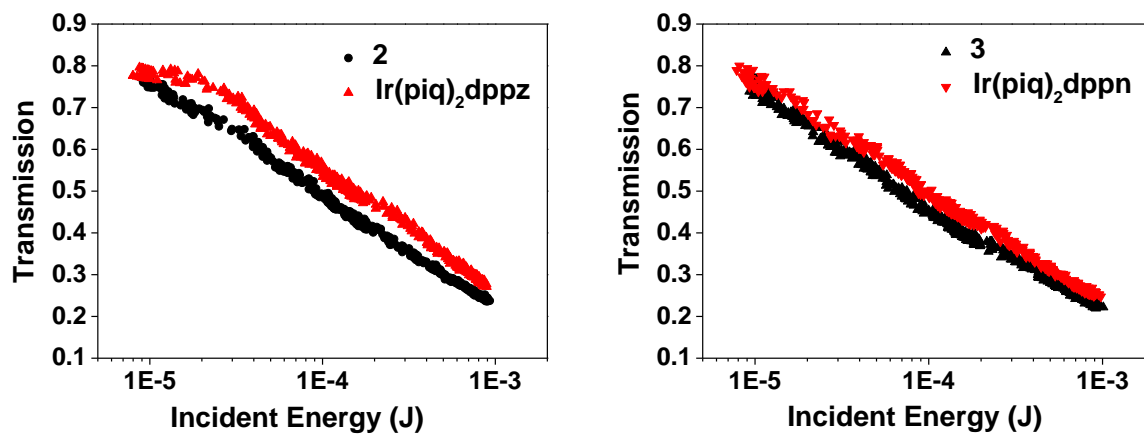

**Fig. S14** Comparison of RSA performance of complex **2** with **Ir(piq)<sub>2</sub>dppz** and complex **3** with **Ir(piq)<sub>2</sub>dppn** in acetonitrile for 4.1-ns laser pulses at 532 nm in a 2-mm cuvette. The linear transmission was adjusted to 80% at 532 nm for each sample in a 2-mm cuvette.
